# Supplementary material for: One-electron oxidation-induced dimerising C–C coupling of a 2,5-diamino-1,4-benzoquinonediimine: a chemical and electrochemical investigation
Source: Royal Society of Chemistry journal article supplement (doi:10.1039/b408762c), 2004-12-08
Supplement: b408762c.pdf [file b408762c.pdf]

## Supplementary data

---

### One-electron oxidation-induced dimerizing C-C coupling of a 2,5-diamino-1,4-benzoquinonediimine: a chemical and electrochemical investigation<sup>†</sup>

---

Jean-philippe Taquet,<sup>a</sup> Olivier Siri,<sup>a</sup> Jean-Paul Collin,<sup>b</sup> Abdellatif Messaoudi,<sup>a</sup> and Pierre Braunstein<sup>\*a</sup>

<sup>a</sup> *Laboratoire de Chimie de Coordination, UMR 7513 CNRS, Université Louis Pasteur, 4, rue Blaise Pascal, 67070 Strasbourg Cedex, France. E-mail: [braunst@chimie.u-strasbg.fr](mailto:braunst@chimie.u-strasbg.fr)*

<sup>b</sup> *Laboratoire de Chimie Organo-Minérale, UMR 7513 CNRS, Université Louis Pasteur, 4, rue Blaise Pascal, 67070 Strasbourg Cedex, France.*

**Extended Hückel calculations**

**Table S1:** Atomic parameters used for the extended Hückel calculations<sup>a</sup>

| Atom | s shell              |                     | p shell              |                     |
|------|----------------------|---------------------|----------------------|---------------------|
|      | H <sub>ii</sub> (eV) | Exponent<br>$\zeta$ | H <sub>ii</sub> (eV) | Exponent<br>$\zeta$ |
| H    | -13.4                | 1.3                 |                      |                     |
| C    | -21.4                | 1.625               | -11.4                | 1.625               |
| N    | -26.0                | 1.95                | -13.4                | 1.95                |

<sup>a</sup> from a) R. Hoffmann, W. N. Lipscomb, *J. Chem. Phys.* **1962**, *36*, 2179; b) R. Hoffmann, W. N. Lipscomb, *J. Chem. Phys.* **1962**, *37*, 2872; (c) R. Hoffmann, *J. Chem. Phys.* **1963**, *39*, 1397.

**Table S2:** Mulliken orbital populations obtained <sup>a</sup> for [3] and [3]<sup>+</sup>.

| Atom/Orbitals     | [3]           | [3] <sup>+</sup> |
|-------------------|---------------|------------------|
| <b>C(1)</b>       |               |                  |
| s                 | 1.163         | 1.163            |
| p <sub>x</sub>    | 0.968         | 0.956            |
| p <sub>y</sub>    | 1.220         | 0.986            |
| p <sub>z</sub>    | 0.944         | 0.944            |
| <b>net charge</b> | <b>-0.296</b> | <b>-0.049</b>    |
| <b>C(2)</b>       |               |                  |
| s                 | 1.095         | 1.095            |
| p <sub>x</sub>    | 0.781         | 0.781            |
| p <sub>y</sub>    | 0.755         | 0.746            |
| p <sub>z</sub>    | 0.902         | 0.902            |
| <b>net charge</b> | <b>0.467</b>  | <b>0.477</b>     |
| <b>C(3)</b>       |               |                  |
| s                 | 1.106         | 1.106            |
| p <sub>x</sub>    | 0.795         | 0.795            |
| p <sub>y</sub>    | 0.802         | 0.781            |
| p <sub>z</sub>    | 0.903         | 0.903            |
| <b>net charge</b> | <b>0.394</b>  | <b>0.415</b>     |
| <b>C(4)</b>       |               |                  |
| s                 | 1.163         | 1.163            |
| p <sub>x</sub>    | 0.968         | 0.956            |
| p <sub>y</sub>    | 1.220         | 0.986            |
| p <sub>z</sub>    | 0.944         | 0.944            |
| <b>net charge</b> | <b>-0.296</b> | <b>-0.049</b>    |
| <b>C(5)</b>       |               |                  |
| s                 | 1.095         | 1.095            |
| p <sub>x</sub>    | 0.781         | 0.781            |
| p <sub>y</sub>    | 0.755         | 0.746            |
| p <sub>z</sub>    | 0.902         | 0.902            |
| <b>net charge</b> | <b>0.467</b>  | <b>0.477</b>     |
| <b>C(6)</b>       |               |                  |
| s                 | 1.106         | 1.106            |
| p <sub>x</sub>    | 0.795         | 0.795            |
| p <sub>y</sub>    | 0.802         | 0.781            |
| p <sub>z</sub>    | 0.903         | 0.903            |
| <b>net charge</b> | <b>0.394</b>  | <b>0.415</b>     |
| <b>N(1)</b>       |               |                  |
| s                 | 1.362         | 1.362            |
| p <sub>x</sub>    | 1.185         | 1.184            |
| p <sub>y</sub>    | 1.670         | 1.546            |
| p <sub>z</sub>    | 1.141         | 1.141            |
| <b>net charge</b> | <b>-0.358</b> | <b>-0.232</b>    |
| <b>N(2)</b>       |               |                  |
| s                 | 1.456         | 1.456            |
| p <sub>x</sub>    | 1.591         | 1.591            |
| p <sub>y</sub>    | 1.549         | 1.484            |

|                   |               |               |
|-------------------|---------------|---------------|
| p <sub>z</sub>    | 1.394         | 1.394         |
| <b>net charge</b> | <b>-0.990</b> | <b>-0.925</b> |
| <b>N(3)</b>       |               |               |
| s                 | 1.362         | 1.362         |
| p <sub>x</sub>    | 1.185         | 1.184         |
| p <sub>y</sub>    | 1.670         | 1.546         |
| p <sub>z</sub>    | 1.141         | 1.141         |
| <b>net charge</b> | <b>-0.358</b> | <b>-0.232</b> |
| <b>N(4)</b>       |               |               |
| s                 | 1.456         | 1.456         |
| p <sub>x</sub>    | 1.591         | 1.591         |
| p <sub>y</sub>    | 1.549         | 1.484         |
| p <sub>z</sub>    | 1.394         | 1.394         |
| <b>net charge</b> | <b>-0.990</b> | <b>-0.925</b> |

<sup>a</sup> in electron, from extended Hückel (EHT) calculations. The z axis is colinear with C(1)-C(4) and xz corresponds approximately to the plane of the C<sub>6</sub> ring.

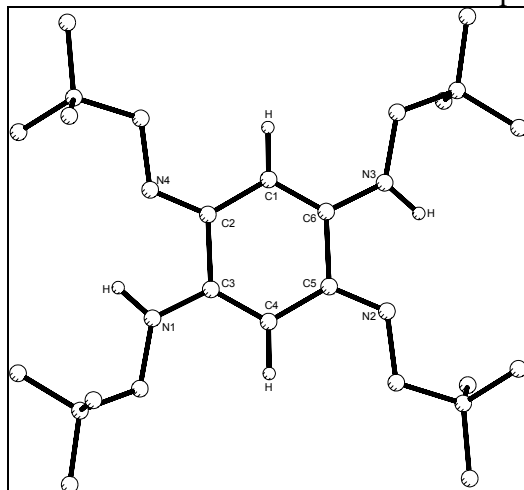

**Figure S1:** Atom numbering in compound **3**

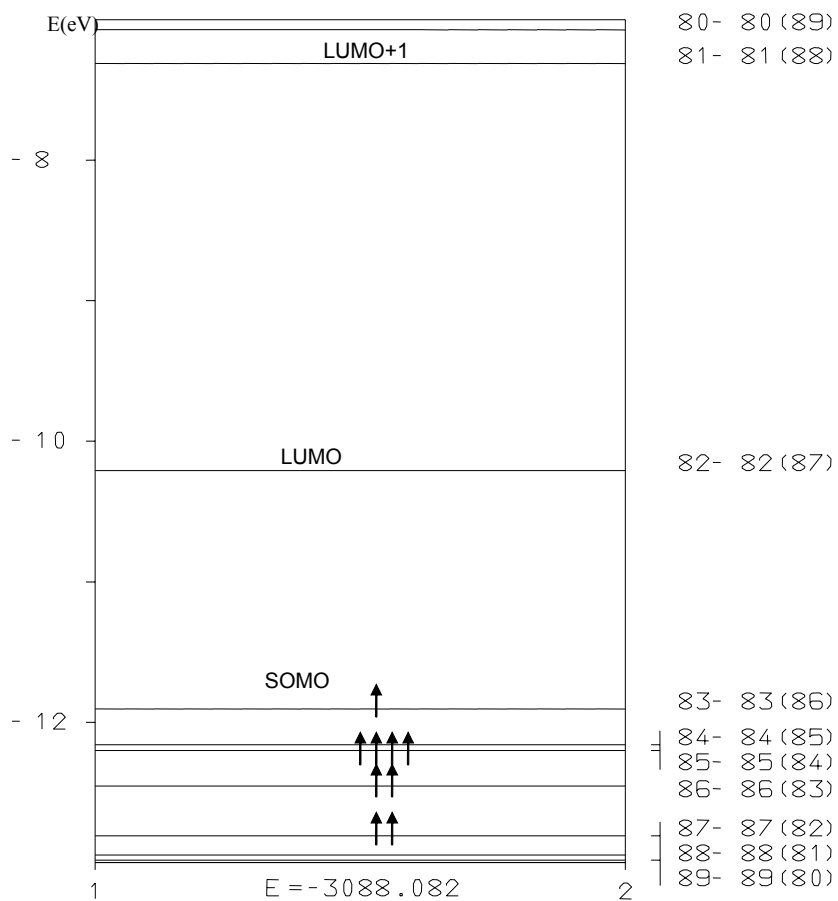

**Figure S2:** MO diagrams of the frontier orbitals for the  $[3]^+$

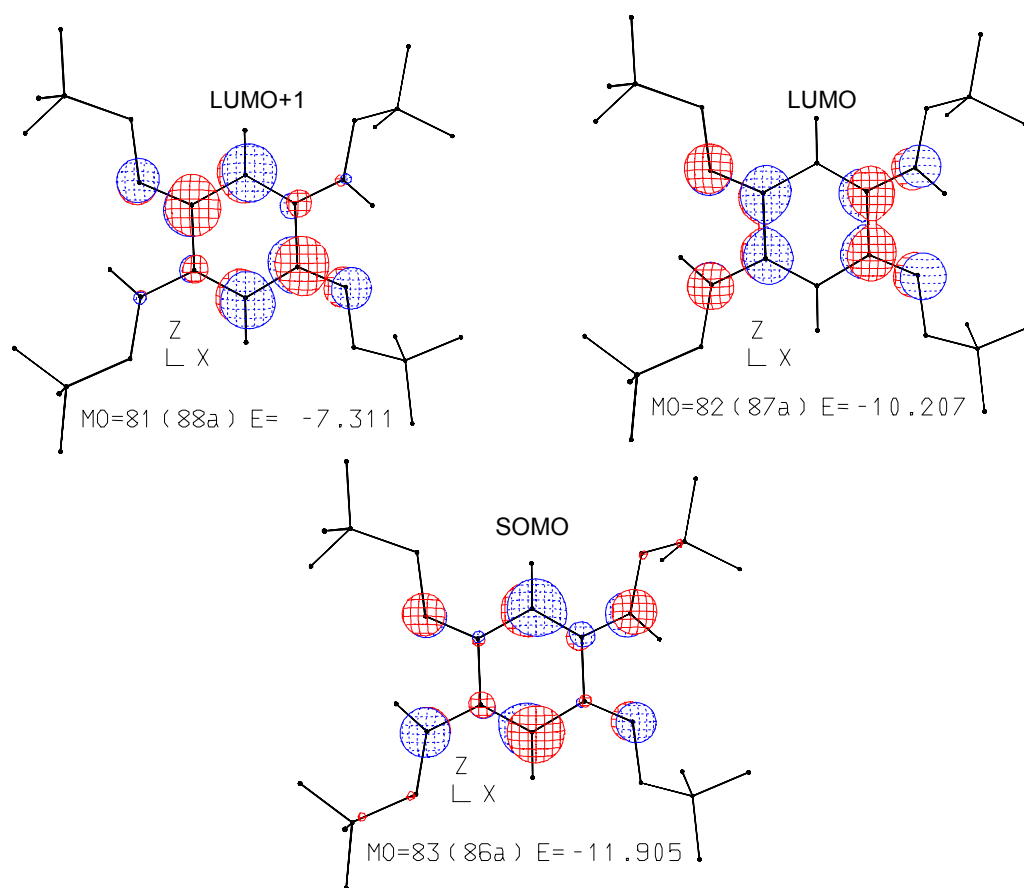

**Figure S3:** MO representation of the LUMO+x ( $x = 0-1$ ) and SOMO for  $[3]^+$
